# Supplementary material for: Risk perceptions and attitudinal responses to COVID-19 pandemic: an online survey in Ethiopia
Source: Springer Nature journal article supplement (doi:10.1186/s12889-021-10939-x), 2021-05-25
Supplement: MOESM1 [file 19195432]

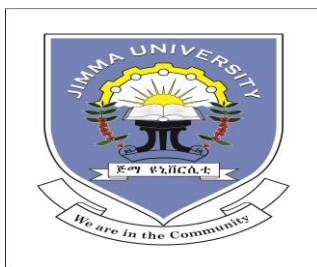

## Jimma University, Institute of Health

### Questionnaire to assess knowledge, community perceptions, responses and practice towards COVID-19

Dear Sir/Madam,

Jimma University, Institute of Health conducting a nationwide rapid assessment to assess knowledge, attitude, practices and responses to COVID-19 diseases among scholars who are supposed to take leading role in combating the spread- academic staffs, health professionals and other civil servants. The study would generate useful information and insight on scholars and community's perceived awareness and extent of self-care practices and responses to communication messages. The finding will help to reshape and make further adaptations of ongoing efforts to prevent the spread of COVID-19 virus. Therefore, we kindly request your honest and kind response to this survey questionnaire. Indeed, your participation is voluntarily. But we highly value participation and contribution at this critical time. It may take 20-30 minutes to fill the question. Your responses will be completely anonymous. If you have any questions regarding this research, contact Zewdie Birhanu (PhD. phone:+251917025852. email: [zbkoricha@yahoo.com](mailto:zbkoricha@yahoo.com), Prof Argaw Ambelu, phone: +251(0)911 82 62 18, email: [aambelu@yahoo.com](mailto:aambelu@yahoo.com) )

We would like to thank you for kindly consenting to participate in this survey.

Please click the link to access the questionnaire

#### **Part I: Background characteristics**

1. What is your age in completed years? \_\_\_\_\_
2. What is your sex?     A. Male             B. Female
3. What are your current educational qualifications?
  - 1)      Primary (grade 1-8)
  - 2)      High school (grade 9-12)
  - 3)      Diploma or Level I-IV
  - 4)      First Degree (BSc/BA)
  - 5)      Medical Doctor-GP
  - 6)      Residents (specify year of residency) \_\_\_\_\_
  - 7)      Master degree
  - 8)      Ph.D
  - 9)      Clinical Specialty /sub-specialty
  - 10)     Other (specify) \_\_\_\_\_
4. What is your current marital status?
  - 1)      Single (unmarried)
  - 2)      Married
  - 3)      Divorced
  - 4)      Widowed
  - 5)      Engaged (in relationship)
5. What is your main occupation?
  - 1)      Merchant/shop

- 2)  Teacher-elementary /high school
- 3)  University-Academic
- 4)  University-administrative staff
- 5)  Health worker in government facilities (specify professional category)\_\_\_\_\_
- 6)  Health worker in private facilities (specify professional category)\_\_\_\_\_
- 7)  Health worker in administration/office (specify professional category)\_\_\_\_\_
- 8)  Private work/business
- 9)  Police/security
- 10)  Government employ (Ethiotelcom, airlines, bank/insurance/transportations)
- 11)  work in NGOs
- 12)  Military
- 13)  House wife
- 14)  Daily labourer
- 15)  Farmer
- 16)  Student
- 17)  No job
- 18)  Private firm/company
- 19)  Other (specify)\_\_\_\_\_

6. Where is your place of residence?

- 1)  Urban
- 2)  Rural

7. In which region of Ethiopia, are you currently living?

- 1)  Addis Ababa
- 2)  Oromia
- 3)  Tigray
- 4)  Ahmara
- 5)  Somali
- 6)  Affar
- 7)  Benishangul Gumuz
- 8)  Gambella
- 9)  Harari
- 10)  Dire Dawa
- 11)  Southern nation nationalities and peoples

8. What is your religion affiliation?

- 1)  Orthodox
- 2)  Muslim
- 3)  Protestant
- 4)  Wakeffeta
- 5)  Other (please specify)\_\_\_\_\_

9. Which internet connection do you mostly use to get information about COVID-19?

- 1)  Broadband-cable

- 2)  Cellular-data(telle)
- 3)  DSL (home private)
- 4)  Wireless-Wifi
- 5)  Do not use internet

**Part II: Exposure to information**

10. Have you heard COVID-19 disease? 1. Yes  2. No

11. What is your main source of information about COVID-19 disease?

- 1)  Internet-official websites
- 2)  Television
- 3)  Radio
- 4)  Friends
- 5)  Internet-social media (Facebook, twitter, YouTube etc)
- 6)  Health workers
- 7)  Neighbors

12. Which source of information about COVID-19 do you most trust? (select two sources you most trust)

- 1)  Government Medias (TV/Radio/newsletter etc)
- 2)  Private Medias (TV/Radio/newsletter etc)
- 3)  Religious leaders
- 4)  Local source (announcement, posters, banners/brochures)
- 5)  National source ( ministry of health, Ethiopian public health institute)
- 6)  International media
- 7)  Social Medias (Facebook/whatsApp/Telegram/ etc)
- 8)  Health Activists (Public figures/etc)
- 9)  Health facilities/professionals
- 10)  Other (please specify\_\_\_\_\_)

13. What are the main clinical symptoms of COVID-19? (Multiple response is possible)

- 1)  Fever
- 2)  Fatigue
- 3)  Dry cough
- 4)  Muscle pain
- 5)  Sore throat
- 6)  Diarrhea
- 7)  Difficulty breathing
- 8)  Body weakness
- 9)  Other (specify)\_\_\_\_\_

**Part III: Perceptions and response to COVID-19 messages**

| For following questions, please indicate (tick) your personal level of agreement with each statement about severity of COVID-19                                                                                               | Indicate your level of agreement by making "X" under category |                          |                            |                          |                          |
|-------------------------------------------------------------------------------------------------------------------------------------------------------------------------------------------------------------------------------|---------------------------------------------------------------|--------------------------|----------------------------|--------------------------|--------------------------|
|                                                                                                                                                                                                                               | Strongly disagree                                             | Disagree                 | Neither agree nor disagree | Agree                    | Strongly agree           |
| 14. I believe that COVID-19 infection is severe disease                                                                                                                                                                       | <input type="checkbox"/>                                      | <input type="checkbox"/> | <input type="checkbox"/>   | <input type="checkbox"/> | <input type="checkbox"/> |
| 15. I would rather die than getting COVID-19 infection                                                                                                                                                                        | <input type="checkbox"/>                                      | <input type="checkbox"/> | <input type="checkbox"/>   | <input type="checkbox"/> | <input type="checkbox"/> |
| 16. I believe that COVID-19 has serious negative consequences on my life                                                                                                                                                      | <input type="checkbox"/>                                      | <input type="checkbox"/> | <input type="checkbox"/>   | <input type="checkbox"/> | <input type="checkbox"/> |
| 17. I believe that COVID-19 is extremely harmful                                                                                                                                                                              | <input type="checkbox"/>                                      | <input type="checkbox"/> | <input type="checkbox"/>   | <input type="checkbox"/> | <input type="checkbox"/> |
| 18. It is likely that I will get COVID-19 infection                                                                                                                                                                           | <input type="checkbox"/>                                      | <input type="checkbox"/> | <input type="checkbox"/>   | <input type="checkbox"/> | <input type="checkbox"/> |
| 19. I am at risk for getting COVID-19 infection                                                                                                                                                                               | <input type="checkbox"/>                                      | <input type="checkbox"/> | <input type="checkbox"/>   | <input type="checkbox"/> | <input type="checkbox"/> |
| 20. It is possible that I will get COVID-19 infection                                                                                                                                                                         | <input type="checkbox"/>                                      | <input type="checkbox"/> | <input type="checkbox"/>   | <input type="checkbox"/> | <input type="checkbox"/> |
| 21. In many aspects, I am less likely to acquire COVID-19                                                                                                                                                                     | <input type="checkbox"/>                                      | <input type="checkbox"/> | <input type="checkbox"/>   | <input type="checkbox"/> | <input type="checkbox"/> |
| For the following questions, please indicate your personal level of agreement regarding the effectiveness of the actions in reducing risk of COVID-19 infections                                                              |                                                               |                          |                            |                          |                          |
| 22. Washing hands frequently with soap and water or using alcohol-based hand rub kills the virus that causes COVID-19                                                                                                         | <input type="checkbox"/>                                      | <input type="checkbox"/> | <input type="checkbox"/>   | <input type="checkbox"/> | <input type="checkbox"/> |
| 23. Maintaining social distancing can prevent infection with coronavirus                                                                                                                                                      | <input type="checkbox"/>                                      | <input type="checkbox"/> | <input type="checkbox"/>   | <input type="checkbox"/> | <input type="checkbox"/> |
| 24. Avoiding touching eyes, nose and mouth prevent infection with coronavirus                                                                                                                                                 | <input type="checkbox"/>                                      | <input type="checkbox"/> | <input type="checkbox"/>   | <input type="checkbox"/> | <input type="checkbox"/> |
| 25. Covering your cough/sneezing using the bend of your elbow or a tissue prevent spread of coronavirus                                                                                                                       | <input type="checkbox"/>                                      | <input type="checkbox"/> | <input type="checkbox"/>   | <input type="checkbox"/> | <input type="checkbox"/> |
| 26. Avoiding crowded places and close contact with anyone prevent infection with coronavirus                                                                                                                                  | <input type="checkbox"/>                                      | <input type="checkbox"/> | <input type="checkbox"/>   | <input type="checkbox"/> | <input type="checkbox"/> |
| 27. Staying at home help to prevent infections from infection with coronavirus                                                                                                                                                | <input type="checkbox"/>                                      | <input type="checkbox"/> | <input type="checkbox"/>   | <input type="checkbox"/> | <input type="checkbox"/> |
| 28. Following good respiratory hygiene is effective to protect the people around you from COVID-19                                                                                                                            | <input type="checkbox"/>                                      | <input type="checkbox"/> | <input type="checkbox"/>   | <input type="checkbox"/> | <input type="checkbox"/> |
| 29. Isolation and treatment of people who are infected with the COVID-19 are effective ways to reduce the spread of the virus                                                                                                 | <input type="checkbox"/>                                      | <input type="checkbox"/> | <input type="checkbox"/>   | <input type="checkbox"/> | <input type="checkbox"/> |
| 30. Staying informed and following advice given by your healthcare provider can reduce the chance of acquiring COVID-19                                                                                                       | <input type="checkbox"/>                                      | <input type="checkbox"/> | <input type="checkbox"/>   | <input type="checkbox"/> | <input type="checkbox"/> |
| 31. For fever, cough and difficulty breathing, seeking medical care early help to manage COVID-19                                                                                                                             | <input type="checkbox"/>                                      | <input type="checkbox"/> | <input type="checkbox"/>   | <input type="checkbox"/> | <input type="checkbox"/> |
| For the following questions, please indicate your personal level of agreement regarding your personal confidence or ability to practice/implement the safety and preventive measures recommend to keep yourself from COVID-19 |                                                               |                          |                            |                          |                          |
| 32. I am confident that I can wash my hands frequently with soap and water or using alcohol-based hand rub kills the virus for COVID-19                                                                                       | <input type="checkbox"/>                                      | <input type="checkbox"/> | <input type="checkbox"/>   | <input type="checkbox"/> | <input type="checkbox"/> |
| 33. I have the skill follow recommended hand washing to prevent myself me from COVID-19.                                                                                                                                      | <input type="checkbox"/>                                      | <input type="checkbox"/> | <input type="checkbox"/>   | <input type="checkbox"/> | <input type="checkbox"/> |
| 34. I have the resource (water , soup) to wash my hands frequently with water and soup to prevent myself me from COVID-19.                                                                                                    | <input type="checkbox"/>                                      | <input type="checkbox"/> | <input type="checkbox"/>   | <input type="checkbox"/> | <input type="checkbox"/> |
| 35. I am confident that I can stay at home easily to prevent COVID-19 .                                                                                                                                                       | <input type="checkbox"/>                                      | <input type="checkbox"/> | <input type="checkbox"/>   | <input type="checkbox"/> | <input type="checkbox"/> |
| 36. By following good respiratory hygiene I can protect the people around me from COVID-19                                                                                                                                    | <input type="checkbox"/>                                      | <input type="checkbox"/> | <input type="checkbox"/>   | <input type="checkbox"/> | <input type="checkbox"/> |
| 37. I can be stay informed and follow advice given by your healthcare provider                                                                                                                                                | <input type="checkbox"/>                                      | <input type="checkbox"/> | <input type="checkbox"/>   | <input type="checkbox"/> | <input type="checkbox"/> |
| 38. I am condiment that I can avoid crowded places and close contact with anyone prevent infection with coronavirus                                                                                                           | <input type="checkbox"/>                                      | <input type="checkbox"/> | <input type="checkbox"/>   | <input type="checkbox"/> | <input type="checkbox"/> |
| 39. I am confidence that Ethiopia can win the battle against the COVID-                                                                                                                                                       | <input type="checkbox"/>                                      | <input type="checkbox"/> | <input type="checkbox"/>   | <input type="checkbox"/> | <input type="checkbox"/> |

|                                                                                                              |                          |                          |                          |                          |                          |
|--------------------------------------------------------------------------------------------------------------|--------------------------|--------------------------|--------------------------|--------------------------|--------------------------|
| 19 virus?                                                                                                    |                          |                          |                          |                          |                          |
| 40. I am confident COVID-19 will finally be successfully controlled in Ethiopia                              | <input type="checkbox"/> | <input type="checkbox"/> | <input type="checkbox"/> | <input type="checkbox"/> | <input type="checkbox"/> |
| 41. Use of personnel protective equipment is effective to prevent COVID-19 infections                        | <input type="checkbox"/> | <input type="checkbox"/> | <input type="checkbox"/> | <input type="checkbox"/> | <input type="checkbox"/> |
| 42. I can always cover my cough using the bend of my elbow or a tissue prevent spread of coronavirus         | <input type="checkbox"/> | <input type="checkbox"/> | <input type="checkbox"/> | <input type="checkbox"/> | <input type="checkbox"/> |
| 43. I can avoid touching my eyes, nose and mouth to prevent infection with coronavirus                       | <input type="checkbox"/> | <input type="checkbox"/> | <input type="checkbox"/> | <input type="checkbox"/> | <input type="checkbox"/> |
| 44. I can maintain at least 1 metre distance between myself and anyone to prevent infection with coronavirus | <input type="checkbox"/> | <input type="checkbox"/> | <input type="checkbox"/> | <input type="checkbox"/> | <input type="checkbox"/> |
